# Supplementary material
Source: Research Square preprint supplement (doi:10.21203/rs.3.rs-9029543/v1)
Supplement: Supplementary file 1 [file 11af8e31b319d96f80cb180e.docx]

This study presents a comprehensive investigation of the Wufeng-Longmaxi Formation in northern Guizhou, a pivotal region for shale gas exploration in China. The research addresses a critical gap in targeted theoretical research by systematically clarifying the fundamental mechanisms of shale gas accumulation in this specific locale. Employing an integrated, multi-dimensional methodology—combining field investigations with experimental analyses of mineralogical, geochemical, and petrological properties, as well as well logging interpretation—this study ensures the scientific rigor and reliability of its findings.

The research definitively characterizes the target formation by identifying its sedimentary environment (primarily anoxic), the origin of its organic matter (marine, predominantly Type Ⅰ), and its core reservoir parameters (average TOC of 3.5%, Ro ranging from 2.1% to 3.4%, and brittle mineral content between 40% and 65%). These characteristics confirm the Wufeng-Longmaxi Formation as a high-quality shale gas reservoir with significant exploitable potential.

Furthermore, the study's predictions reveal substantial shale gas reserves and recoverable volumes in the vicinity of the northern Guizhou syncline swarm. The strong positive correlation between these predictions and existing shale wells in the syncline-controlled area significantly enhances the practical guiding significance of this research. Ultimately, this work provides robust theoretical support for exploration and accumulation assessment in undeveloped organic-rich shales of the Wufeng-Longmaxi Formation, establishing a solid foundation for future regional shale gas exploration and development.
